# Supplementary material for: Inhibitory and Toxic Effects of Volatiles Emitted by Strains of Pseudomonas and Serratia on Growth and Survival of Selected Microorganisms, Caenorhabditis elegans, and Drosophila melanogaster
Source: PubMed Central journal article supplement (PMC4071779; doi:10.1155/2014/125704), 2014-06-11
Supplement: 125704.f1.pdf [file 125704.f1.pdf]

## Supplemental Materials

Fig. S1-A GC-MS chromatogram of VOCs emitted by *P. chlororaphis* 449 (growth on LA 24 h)

| Retention time, min | Compound                                        |
|---------------------|-------------------------------------------------|
| 11.160              | Butanol-1                                       |
| 11.8                | Methyl thiolacetate                             |
| 12.957              | <b>Dimethyldisulfide</b>                        |
| 15.732              | <b>2-Heptanone</b>                              |
| 17.114              | 4,4-Dimethyl-2-neopentyl-1-pentene or similar   |
| 17.233              | 2,2,4,6,6-Pentamethylheptene-3 or similar       |
| 17.313              | (3E)-2,2,3,5,6-Pentamethyl-3-heptene or similar |
| 17.810              | 2,2,4,6,6-Pentamethyl-3-heptene or similar      |
| 17.934              | 2,2,4,6,6-Pentamethyl-3-heptene or similar      |
| 18.340              | 2,4,4,6,6,8,8-Heptamethyl-1-nonene or similar   |
| 18.490              | <b>Undecene-1</b>                               |
| 19.284              | <b>2-Nonanone</b>                               |
| 22.593              | <b>2-Undecanone</b>                             |
| 26.366              | (?)-Decen-1-ol acetate or similar               |

Abundance

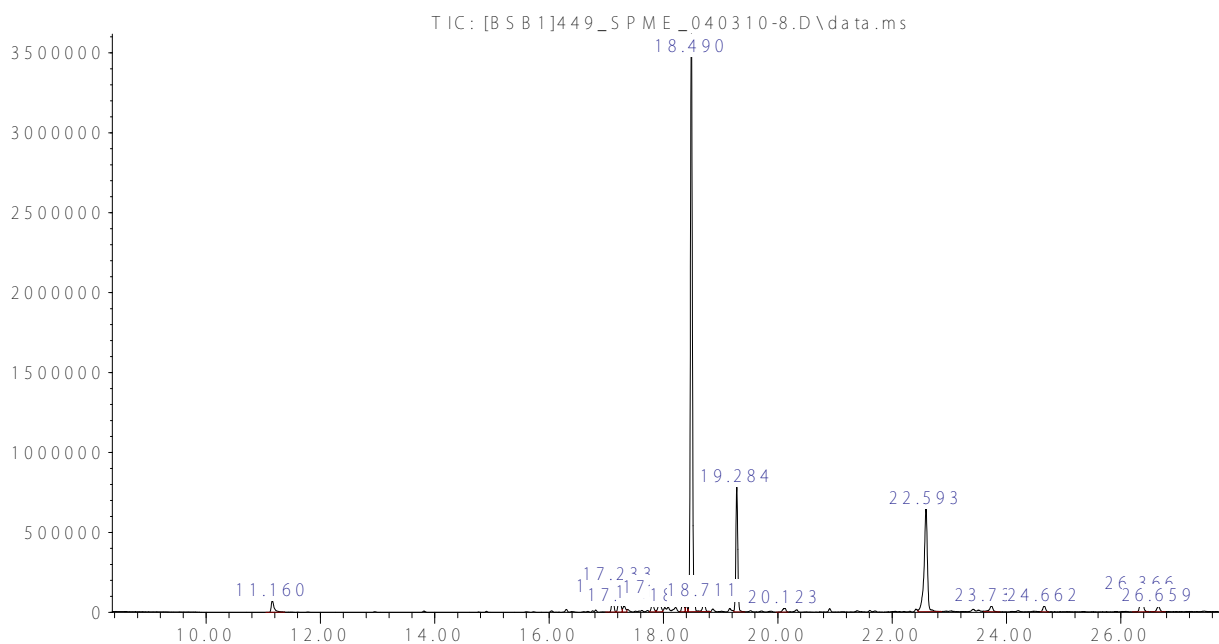

Fig. S1-B GC-MS chromatogram of VOCs emitted by *S. proteamaculans* 94 (growth on LA 24 h)

| Retention time, min | Compound               |
|---------------------|------------------------|
| 12.653              | Isopentanol            |
| 12.951              | <b>DMDS</b>            |
| 15.712              | <b>2-Heptanone</b>     |
| 16.215              | 1,5-Dimethylpyrazine   |
| 16.7-22.58          | Aliphatic hydrocarbons |
| 22.685              | S-Methyl thiooctanoate |

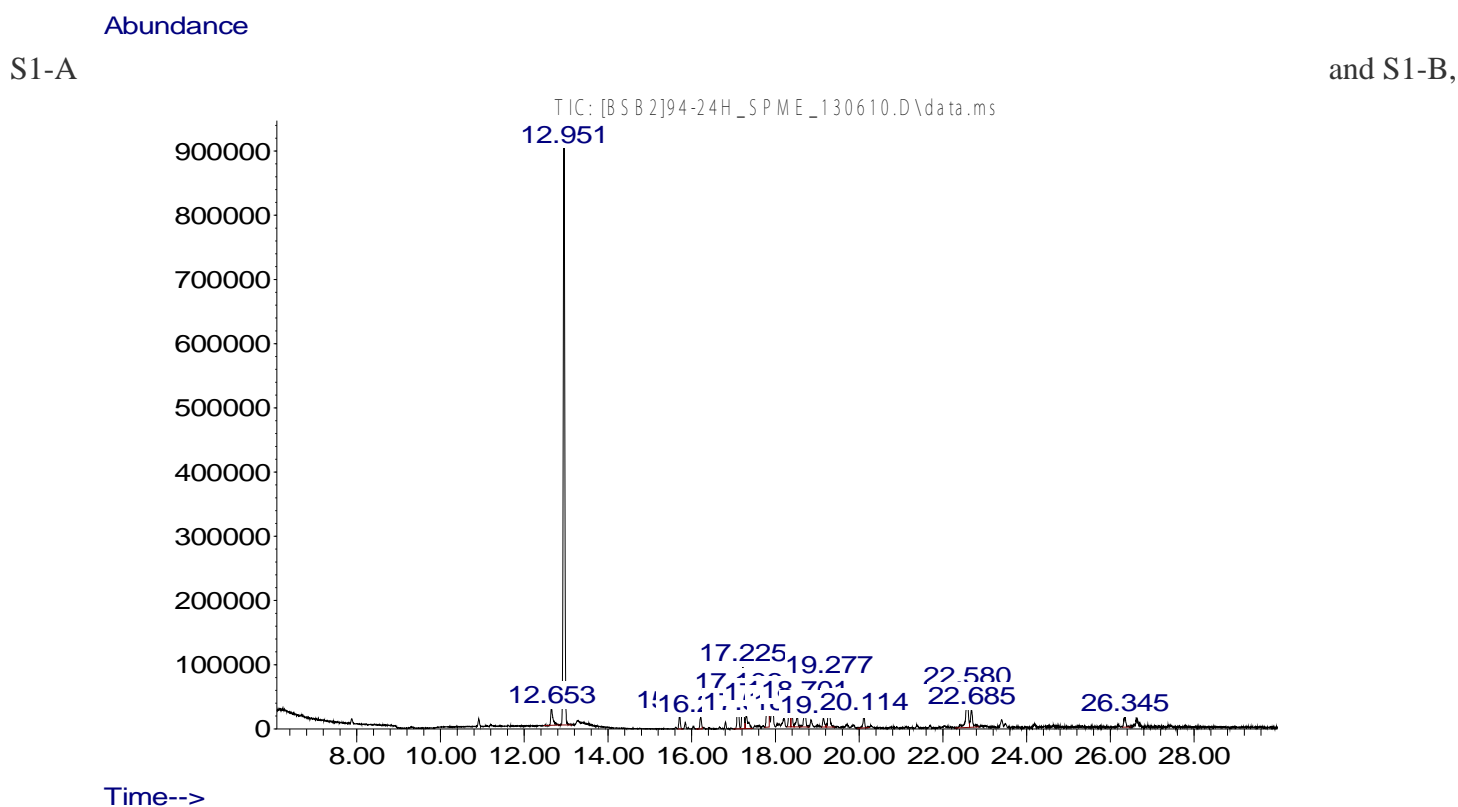

Headspace peak areas of volatiles produced by strains *P. chlororaphis* 449 and *S. proteamaculans* 94, respectively, grown on LA for 24 h at 28°C. VOCs were analyzed by Headspace Solid-Phase Microextraction–Gas Chromatography–Mass Spectrometry (HS SPME–GC–MS) as described in Materials and Methods (p. 2.5) and notes to Table 4. List of identified compounds corresponding to the indicated retention time are presented in Table 4 and shown here above corresponding GC/MS chromatograms for convenience of the reader.
